# Supplementary material for: Differentially activated B cells develop regulatory phenotype and show varying immunosuppressive features: a comparative study
Source: PubMed Central journal article supplement (PMC10509016; doi:10.3389/fimmu.2023.1178445), 2023-09-05
Supplement: Presentation_1.pdf [file Presentation_1.pdf]

Supplementary Material

Differentially activated B cells develop regulatory phenotype and show varying immunosuppressive features: a comparative study

Elina A. Zheremyan<sup>1,\*</sup>, Alina S. Ustiugova<sup>1</sup>, Aksinya N. Uvarova<sup>1,2</sup>, Nina M. Karamushka<sup>2</sup>, Ekaterina M. Stasevich<sup>1</sup>, Violetta S. Gogoleva<sup>1</sup>, Apollinariya V. Bogolyubova<sup>3</sup>, Nikita A. Mitkin<sup>1</sup>, Dmitry V. Kuprash<sup>1,2</sup>, Kirill V. Korneev<sup>1,3,\*</sup>

\* Correspondence:

Elina A. Zheremyan: [elyazheremyan@mail.ru](mailto:elyazheremyan@mail.ru)

Kirill V. Korneev: [kirkorneev@gmail.com](mailto:kirkorneev@gmail.com)

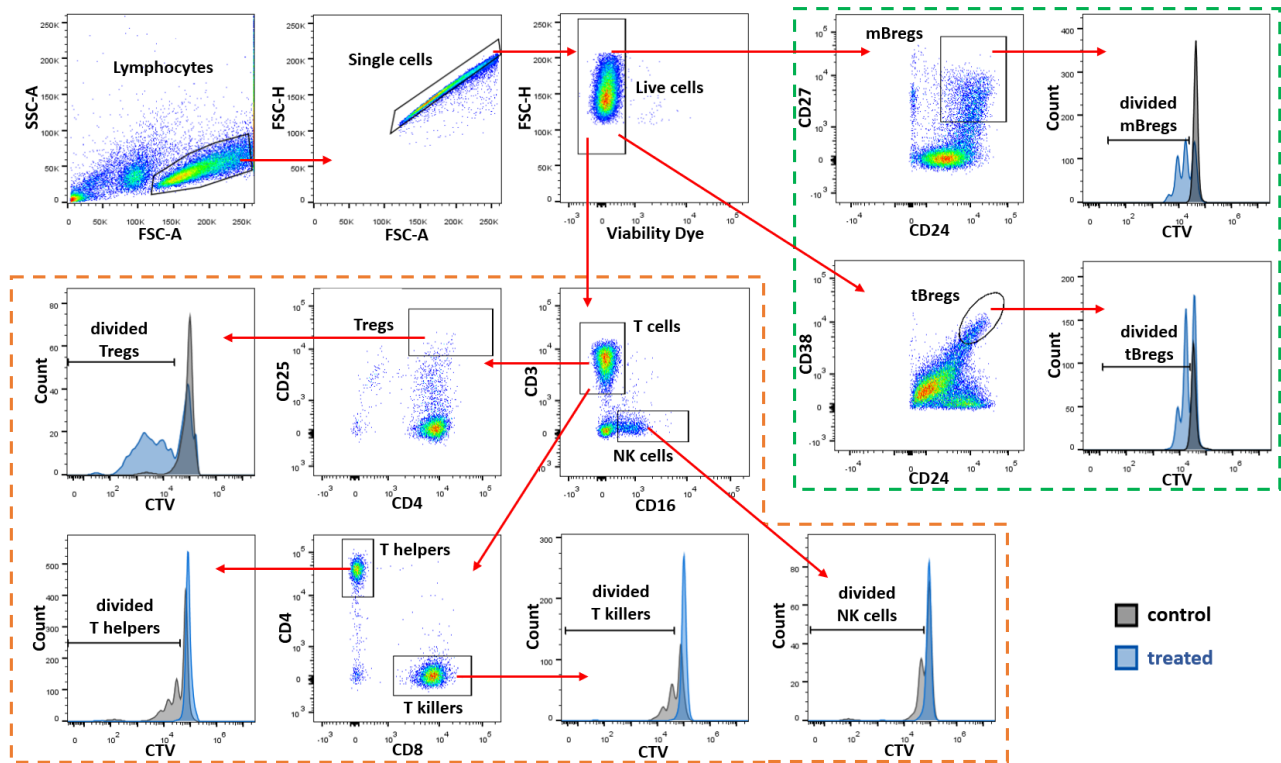

**Figure S1.** Flow cytometry gating strategies for the assessment of cell ratio and proliferation rates of Breg subsets and effector cells. **Right green area:** Identification of the ratio and cell division rates of mBreg (CD24<sup>hi</sup>CD27<sup>+</sup>) and tBreg (CD24<sup>hi</sup>CD38<sup>hi</sup>) subpopulations in live CD19<sup>+</sup> cells isolated by magnetic separation. **Left orange area:** Identification of the ratio and proliferation rates of effector lymphocytes: CD3<sup>+</sup> T cells (CD8<sup>+</sup> T killers, CD4<sup>+</sup> T helpers and CD4<sup>+</sup>CD25<sup>hi</sup> regulatory T cells) and CD3<sup>-</sup>CD16<sup>+</sup> NK cells in CD19<sup>-</sup>-depleted PBMCs.

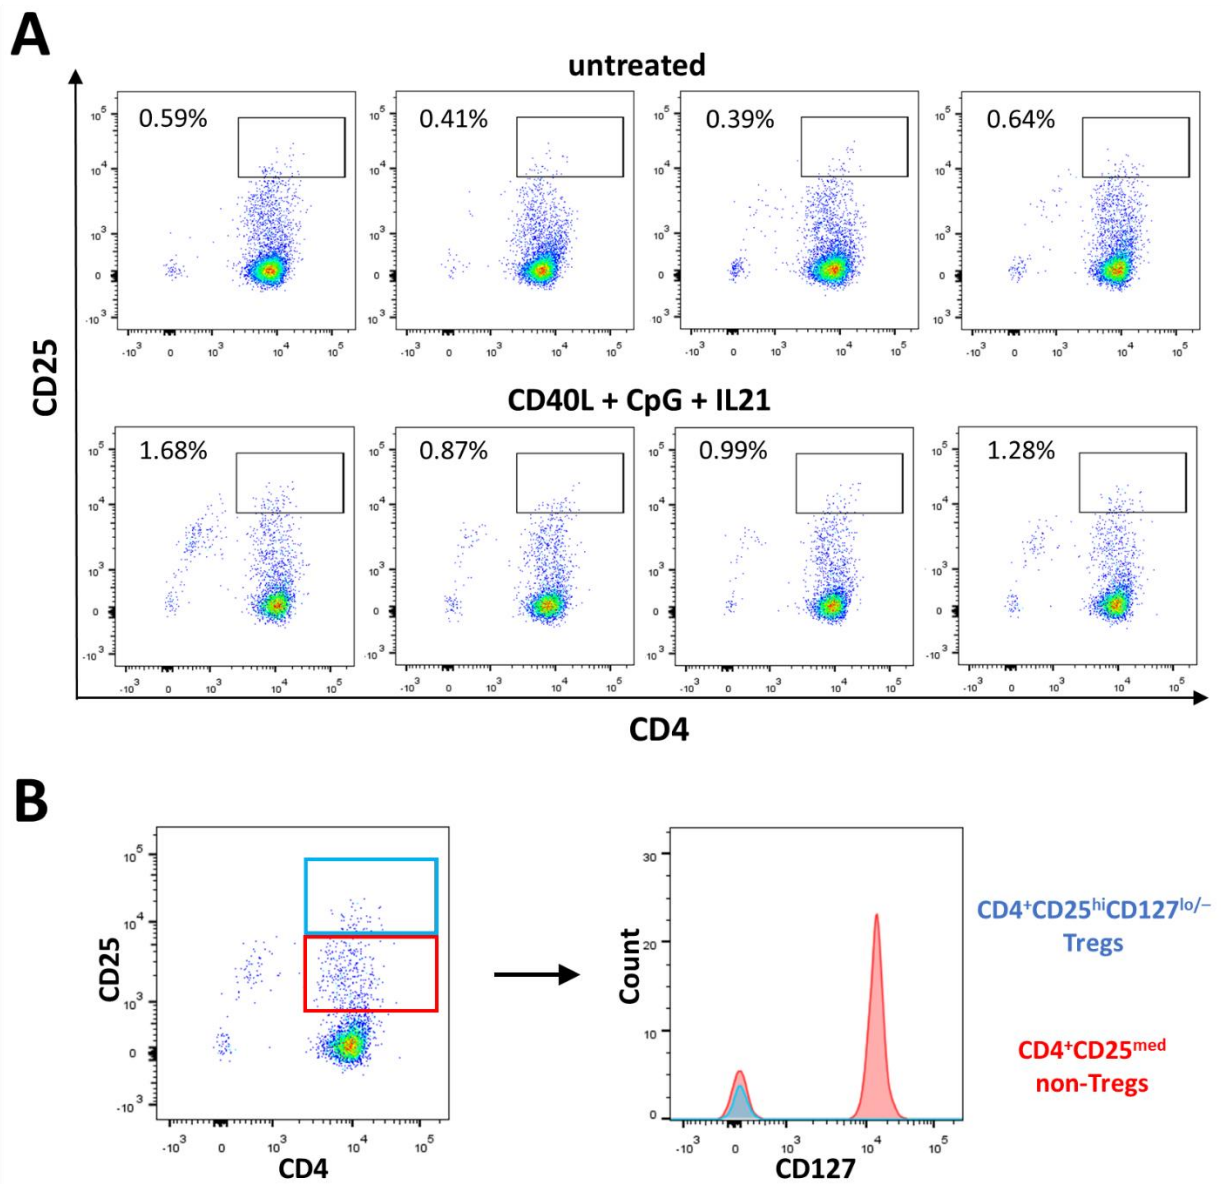

**Figure S2.** (A) The assessment of  $CD4^+CD25^{hi}$  (regulatory T cells) ratio of  $CD3^+$  T cells after 5 days of co-incubation of  $CD19^+$ -depleted PBMCs with activated ( $CD40L + CpG + IL21$ ) and untreated B cells. (B) Verification of  $CD4^+CD25^{hi}$  T cells for low expression of CD127, which is characteristic of Tregs.

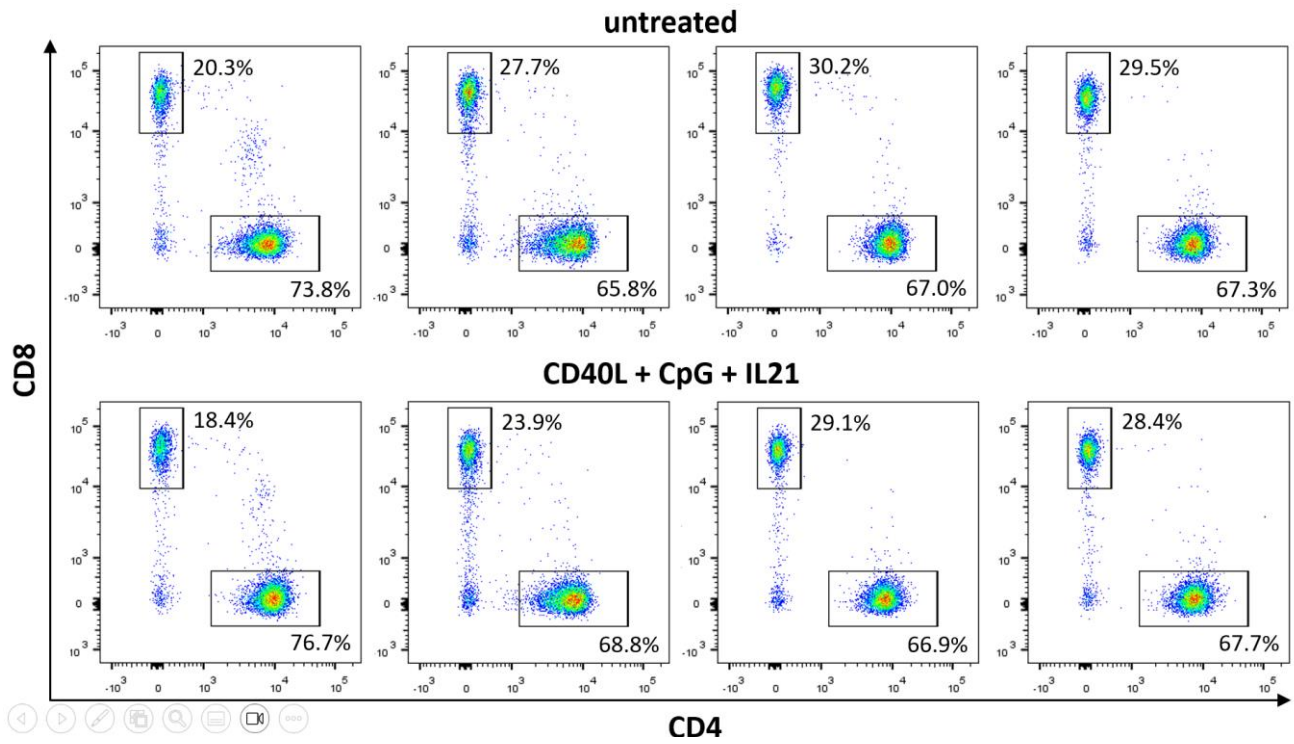

**Figure S3.** Distribution of CD4<sup>+</sup> (T helpers) and CD8<sup>+</sup> (T killers) T cell subsets after 5 days of co-incubation of CD19<sup>+</sup>-depleted PBMCs with activated (CD40L + CpG + IL21) and untreated B cells.

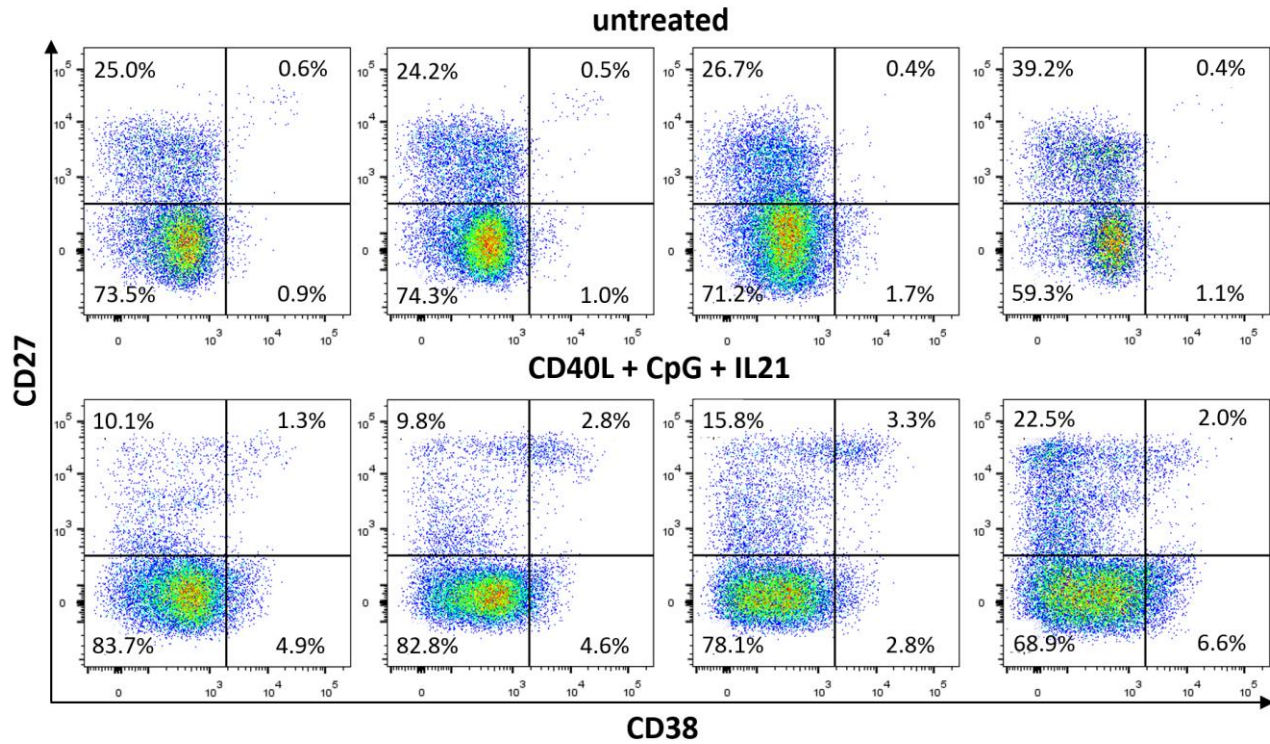

**Figure S4.** Distribution of CD27<sup>-</sup>CD38<sup>int</sup> (naïve B cells), CD27<sup>+</sup>CD38<sup>+/-</sup> (memory B cells), and CD27<sup>hi</sup>CD38<sup>hi</sup> (plasmablasts) B cell subsets after 5 days of stimulation with CD40L + CpG + IL21 or without any activation.
